# Supplementary material for: Getting to guanine: mechanism and dynamics of charge separation and charge recombination in DNA revisited
Source: Royal Society of Chemistry journal article supplement (doi:10.1039/b719715b), 2008-03-13
Supplement: b719715b.pdf [file b719715b.pdf]

Supporting Information for:

**Getting to Guanine: Mechanism and Dynamics of Charge Separation and Charge Recombination in DNA Revisited**

*Frederick D. Lewis,<sup>\*†</sup> Huihe Zhu,<sup>†</sup> Pierre Daublain,<sup>†</sup> Karsten Sigmund,<sup>†</sup>*

*Torsten Fiebig,<sup>\*‡</sup> Milen Raytchev,<sup>‡</sup> Qiang Wang<sup>‡</sup> and Vladimir Shafirovich<sup>\*§</sup>*

**Figure S1.** Pump-probe transient absorption spectra for hairpin **TG** in the time range of 0.5 ps to 1.8 ns after excitation at 338 nm. Early spectra are shown in blue/green, and late spectra are shown in orange/red colors. Inset shows time dependent 520/574 nm band intensity ratio with biexponential fitting.

**Figure S2.** Pump-probe transient absorption spectra for hairpin **T<sub>2</sub>G** in the time range of 0.5 ps to 1.8 ns after excitation at 338 nm. Early spectra are shown in blue/green, and late spectra are shown in orange/red colors. Inset shows time dependent 520/574 nm band intensity ratio with biexponential fitting.

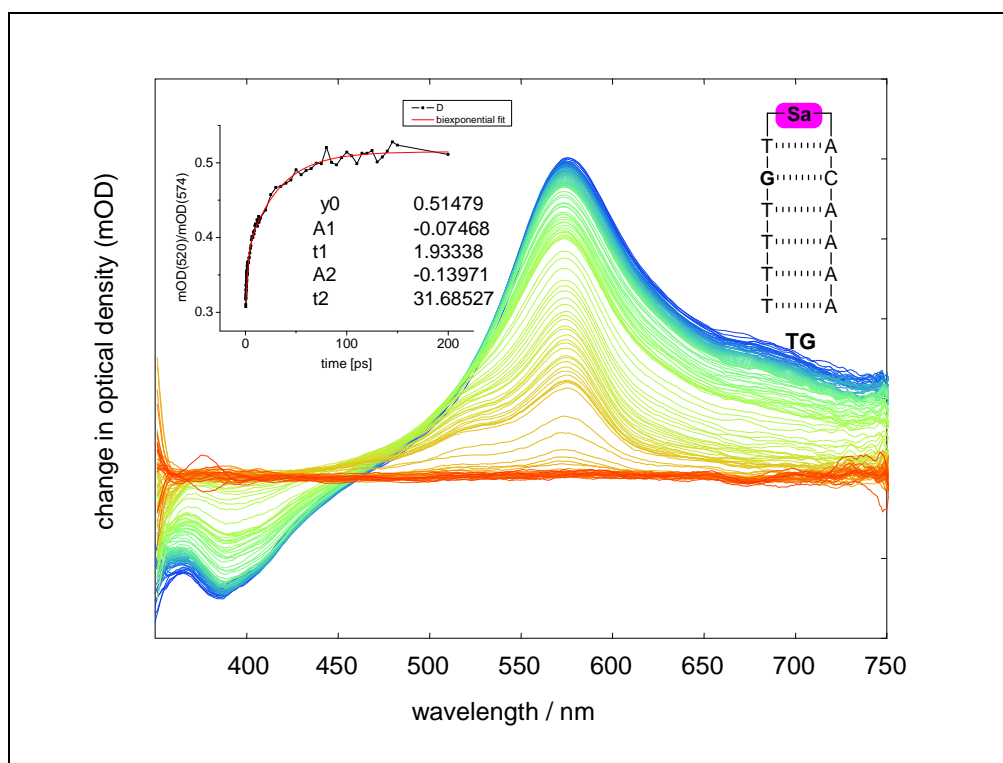

**Figure S1.** Pump-probe transient absorption spectra for hairpin **TG** in the time range of 0.5 ps to 1.8 ns after excitation at 338 nm. Early spectra are shown in blue/green, and late spectra are shown in orange/red colors. Inset shows time dependent 520/574 nm band intensity ratio with biexponential fitting.

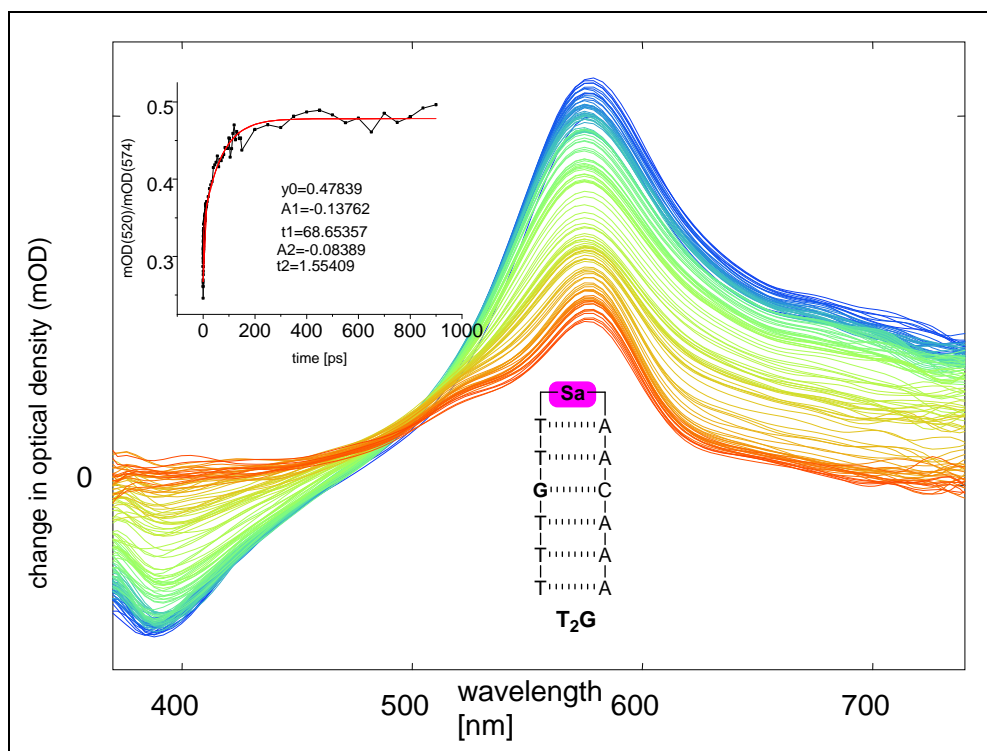

**Figure S2.** Pump-probe transient absorption spectra for hairpin  $T_2G$  in the time range of 0.5 ps to 1.8 ns after excitation at 338 nm. Early spectra are shown in blue/green, and late spectra are shown in orange/red colors. Inset shows time dependent 520/574 nm band intensity ratio with biexponential fitting.
